# Supplementary material
Source: publisher figshare collection journal article supplement (https://geolsoc.figshare.com/ndownloader/files/5420741)
Supplement: Supplementary file 1 [file 5420741]

Table A 2: Sample location and mineral modes of the lithounits of the Andaman ophiolite
Sample	UM4	UM6	GTS9	262	282	282b	TB3	327	327a	302	77	77a	K3/07	K4/07	PN30	Ch2	KT/1	KT/2	KT6	Ch5	Ch8	UCB2	383	Kg2/b	388 A	C3	C4	KG3A	KG3A	822	Kg14	Kg12	T4a	D1	T1A	Kg2	Rang	GB	64/5	64/6	PN4*	192c*$	D6* $	BB1*	BB2*	383A
Coordinates	12º34´45''N 92º57´05''E	12º34´45''N 92º57´05''E	12º38´50''N 92º39´49''E	11º32´30''N 92º43´40''E	11º30´50''N 92º42´40''E	11º30´48''N 92º42´35''E	12º38´48''N 92º39´49''E	12º50´00''N 92º55´43''E	11º30´40''N 92º42´25''E	12º50´00''N 92º55´43''E	12º50´00''N 92º55´43''E	12º50´00''N 92º55´43''E	12º50´00''N 92º55´43''E	12º50´00''N 92º55´43''E	12º35´05''N 92º57´00''E	12º34´50''N 92º56´55''E	13º08´40''N 92º58´30''E	13º08´40''N 92º58´30''E	13º08´40''N 92º58´30''E	12º34´50''N 92º56´55''E	12º35´05''N 92º57´00''E	12º37´42''N 92º39´54''E	11º32´05''N 92º43´40''E	11º32´15''N 92º42´40''E	11º32´08''N 92º42´30''E	11º28´40''N 92º40´35''E	11º28´35''N 92º40´35''E	11º32´00''N 92º43´30''E	11º32´00''N 92º43´30''E	11º32´18''N 92º42´40''E	11º32´15''N 92º42´40''E	11º32´15''N 92º42´40''E	11º33´05''N 92º42´45''E	11º33´00''N 92º42´45''E	11º33´28''N 92º43´50''E	11º32´45''N 92º42´40''E	11º32´30''N 92º43´35''E	11º29´40''N 92º42´30''E	11º33´28''N 92º43´50''E	11º33´28''N 92º43´50''E	11º32´25''N 92º42´20''E	11º29´40''N 92º42´30''E	11º33´10''N 92º43´10''E	11º37´10''N 92º44´59''E	11º36´44''N 92º44´58''E	11º30´45''N 92º42´25''E
Type of rocks	Mantle																					Layered rocks															Dykes				Extrusives
Lithology	L	L	L	L	H	H	H	H	H	L	DP	DP	CP	CP	CP	CP	CP	CP	CP	CP	CP	L	L	L	D	D	D	ON	ON	ON	ON	C	G	G	OG	G	HG	HG	HG	HG	BN	BN	B	B	B	B
Olivine (%)	70	68.5	65	50	70	65.5	69.5	83.5	85	54.2	98	97.5	95	96	1.5	2		1.5	1	2.5	1	50	80	30	97.5	96	98.5	8	7	25	30	4	1		10						n.d	n.d	n.d	n.d	n.d	n.d
Orthopyroxene(%)	23	24	23	35	27	31	30	15	13	39			4	3	-	-					2	33.5	13	6	1.5			20	22					5	-	5					n.d	n.d	n.d	n.d	n.d	n.d
Clinopyroxene(%)	6	7	10	13	-	-				6					-	1	2					15	6	64				25	26	75	70	96	60	65	60	30	35	30	45	48	n.d	n.d	n.d	n.d	n.d	n.d
Chromite(%)	1	0.5	2	2	3	3.5	0.5	1.5	2	0.8	2	2.5	1	1	98.5	97	98	98.5	99	97.5	97	1.5	1		1	4	1.5	-	-	-	-	-	-	-	-	-	Magnetite- 5	-	-	-	n.d	n.d	n.d	n.d	n.d	n.d
Plagioclase(%)	-	-	-	-	-	-	-	-	-	-	-	-	-	-	-	-	-	-	-	-	-	-	-	-	-	-	-	47	45	-	-	-	39	30	30	65	40	60	55	52	n.d	n.d	n.d	n.d	n.d	n.d
Amphibole(%)	-	-	-	-	-	-	-	-	-	-	-	-	-	-	-	-	-	-	-	-	-	-	-	-	-	-	-	-	-	-	-	-	-	-	-	-	20	10	-	-	-	-	-	-	-	-
L-lherzolite,H- harzburgite, DP dunite pods,CP-chromitite pods,D-dunite,OC-olivine clinopyroxenite,C-clinopyroxenite,OG-olivine gabbro,ON-olivine norite,G –gabbro,HG- homogenous gabbro, BN-boninite,B-basalt
